# Supplementary material for: Morphological changes in the lower Lancang River due to extensive human activities
Source: PeerJ. 2020 Jul 23;8:e9471. doi: 10.7717/peerj.9471 (PMC7382937; doi:10.7717/peerj.9471)
Supplement: Supplemental Information 1 [file peerj-08-9471-s001.xlsx]

## Sheet: sheet1
	Jinghongba reach						Ganlanba reach
Number	1993-2003		2003-2009		2009-2016		1993-2003		2003-2009		2009-2016
	erosion(km²)	accretion(km²)	erosion(km²)	accretion(km²)	erosion(km²)	accretion(km²)	erosion(km²)	accretion(km²)	erosion(km²)	accretion(km²)	erosion(km²)	accretion(km²)
1	0.0037	0.002	0.001	0.002	0.001	4e-05	0.0036	0.0004	0.00053	0.00064	0.00062	0.0007
2	0.0018	0.002	0.001	0.0005	0.0048	0.00036	0.0005	0.00051	0.00041	0.0009	0.0008	6.3e-05
3	0.0021	0.001	0.0004	0.001	0.0156	0.00061	9e-05	5e-05		0.00046	0.0083	0.00072
4	0.0011	0.002	0.0007	0.002	0.00037	7e-06	0.00012	0.00069	0.000583	3e-05	0.00048	0.00041
5	0.0002	0.001	0.0003	0.001	0.00047	3e-05	0.025	3e-05	0.023	0.0258	0.00072	0.0007
6	0.0016	0.002	6e-05	0.0005	0.000289	0.0167	4.8e-05	5.7e-05	0.0006	0.0006	0.003	0.00049
7	0.0048	0.004	0.0002	6e-05	0.00047	0.00041	0.000365	8e-05	0.000582	0.00073	9.4e-05	0.00082
8	0.002	0.002	0.003	0.003	0.000368	0.0163	0.000278	0.026	0.0083	0.0059	0.0062	0.00059
9	0.0016	0.0002	0.0006	0.00346	0.00156	5e-05	4e-05	4e-05	4e-05	0.00047	0.037	0.00029
10	0.0026	0.0006	7e-05	0.00168	0.024	0.000198	0.000275	0.00274	0.00092	0.00063	0.0005	0.0002
11	0.0074	0.001	0.009	0.00156	0.0047	0.000482	0.000351	0.0007	0.00051	0.0005	0.00083	0.000276
12	0.016	0.0006	0.0003	0.0023	0.000652	0.000374	0.000365	9.3e-05	0.0072	0.00074	0.00026	0.0049
13	0.0027	0.0004	0.0002	0.0049	0.035	0.0021	0.000264	0.00026	0.00025	0.00092	0.00073	0.00059
14	0.0029	0.0003	0.003	0.0032	0.00048	0.000374	0.000485	0.00074	0.00092	0.00047	0.0058	7e-05
15	0.02	0.001	0.003	0.0037	0.00267	6e-05	0.0002954	6e-05	2e-05	0.0032	0.0007	0.0026
16	0.0029		0.002	0.0189	0.00058	5.6e-06	0.00047	0.0071	0.00073	0.0364	0.00037	4e-05
17	0.0021		0.001	0.0248	0.0073	0.015	0.035	5e-05	0.0064	0.00058	7e-05	0.000278
18	0.035		0.002	0.0149	0.0008	0.0036	6.1e-05	0.036	0.0009	0.00052	0.00052	0.00047
19	0.0031		0.004	0.00047	0.00375	4e-05	0.00049	5e-05	0.025	0.0037	0.00083	6e-05
20	0.0066		0.0005	0.0037	0.042	0.0063	0.00094	6e-06	0.0004	0.049	5e-05	1e-05
21	0.0025			0.0006	0.0006	0.00014	0.000586	0.00532	0.0005	0.0007	0.00084	5e-05
22	0.0051			0.00081	4.7e-05	0.026	0.0042	0.0069	0.00083	0.00048	0.00073
23	0.0012			0.0027	0.00064	4.8e-05	7.5e-05	0.0074	0.00753	5e-05	9.2e-05
24	0.004			0.039	0.000694	5e-06	0.000836	0.0006	0.00035	0.0083	0.00083
25	0.0031			0.017	0.000639	0.000643	0.0024	4e-05	0.0006	0.0036	0.00074
26	0.015			0.039	0.00047	0.001485	0.00538	0.00057	3e-05	0.00053	0.000531
27	0.0036			0.0028	0.0462	0.000274	0.0365	0.000376	0.000743	6e-05	0.00094
28	0.032			0.028	1e-05	0.000138	9e-06	2e-05	0.00046	0.0093	0.000486
29	0.0002			0.029	0.0058	0.001082	0.000631	0.0254	0.00048	0.00048	7.2e-05
30	0.0042			0.00891	0.0073	0.002284	0.00175	0.00065	0.003	0.0056	0.00693
31	0.002			0.0095	0.0007	0.000146	0.000734	0.0009	0.029	4e-05	0.00074
32	0.0046			0.00068	0.000486	0.0001285	0.00472	0.00063	0.006	0.00093	0.00083
33	0.027			0.0147	5e-05	0.0010582	0.00963	7e-06	0.00057	0.00072	0.00074
34	0.047			0.069	6e-05	0.00045	0.01063	0.0005	0.00073	0.0048	7.9e-05
35	0.073			0.007	0.000573	0.001183	6e-05	0.000573	0.0083	0.0057	0.00083
36	0.0059			0.028	0.000583	0.00375	0.001453	0.00047	0.00066	0.0008	7.5e-05
37	0.00037			0.0178	0.000592	0.0003	0.00142	0.00597	0.0083	0.00062	0.0008
38	0.0029			0.0167	0.00083		0.000476	0.00053	0.0005	5e-05	0.049
39	0.021			0.0049	0.052		0.001063	0.0074	0.0048	0.0008	0.00075
40	0.00069			0.0028	0.0006		0.000585	0.000713	0.0005	0.069	0.00086
41	0.00048			0.0029	0.000418		0.0843	0.0005	0.0073	0.0005	8e-05
42	0.00027			0.0071	0.0004		0.0005	0.0083	0.0069	7e-05	0.00076
43	0.0039			0.037	0.00285		0.00473	0.000628	0.0094	0.0063	0.0053
44	0.0074			0.0006	3.7e-05		0.0005	0.0005	0.0083	0.0005	0.0084
45	0.00268			0.00039	0.026		0.000472	0.00974	0.0069	0.00083	0.0006
46	0.0004			0.0019	0.0005		0.00584	0.00053	0.046	0.003	8.4e-05
47	0.035			0.00048	0.000638		6e-05	7.5e-05	0.0008	0.00038	0.0075
48	0.00059			0.0005	0.01062		0.00017	0.0094	0.0083	0.00083	0.00034
49	0.0047			0.0016	0.035		0.000538	5.7e-05	0.0005	0.0091	0.021
50	0.016			5e-05	0.0057		0.0156	0.0006	0.047	0.0005	0.0073
51	0.0058			0.00059	0.0005		0.0004	0.00083	0.0006	0.0002	0.0064
52	0.038			0.0015	0.0059		0.00375	0.0092	0.0093	0.0365	0.0243
53	0.00059			0.037	0.00048		6e-05	0.00074	0.0005	0.0069	0.00063
54	0.00192			0.0047	0.0047		0.0476	0.0006	0.036	0.0007	0.00084
55	0.00048			0.0029	0.016		5e-05	0.046	7e-05	0.00495	0.00069
56	0.00049			0.027	0.00057		0.00531	4.7e-05	0.00063	0.0006	0.00084
57	0.00063			0.014	0.00028		5e-05	0.00835	0.0069	0.0008	0.00076
58	0.00047			0.0006	0.037		0.000476	0.000742	0.0084	4e-05	9e-05
59	6.9e-05			0.0039	0.0006		0.000496	4.7e-05	0.0007	0.00074	0.0009
60	0.0004			0.0092	4.8e-05		3e-05	0.000563	0.0052	0.0095	0.00052
61	0.02556			0.0039	0.00069		0.00942	0.006932	0.0074	0.0083	0.00083
62	0.058			0.025	0.000276		0.000537	0.03	0.0007	0.057	0.00175
63	0.00058			0.005	0.000264		5e-05	0.0376	0.0009		0.026
64	0.003684			0.00049	0.00083		0.026	0.00057	0.025		0.0005
65	0.000427			0.0003	0.00068		0.0375	0.00084	0.00054		0.00073
66	0.0157			0.0029	0.0157		3e-05	7e-05	0.0005		0.0075
67	0.00427			0.0015	0.0264		0.014	0.00063	0.00052		0.00096
68	0.02648			0.027	5e-05		0.0058	0.00694	0.0074		0.00537
69	0.00427			0.0004	0.00037		0.0365	0.00074	0.0005		0.048
70	0.00486			0.0028	0.00026		6e-05	0.000852	0.0093		0.0007
71	0.027			0.0059	5.8e-05		0.0065	0.009576	0.005		0.00532
72	0.00486			0.057	3e-05		0.00073	6.4e-05	7e-05		0.0069
73	0.03375			0.0005	0.00073		5e-05	0.000884	0.0046		0.0004
74	0.0421			0.00079	0.0006		0.00583	0.00074	0.0065		0.0079
75	0.00038			0.0037	0.017		0.0006	6e-06			0.0004
76	0.00286			0.002	0.0105		0.00563	8.3e-05			0.0008
77	0.0213			0.0047	0.00062		5e-05	0.00694			0.0083
78	0.00486			0.026	5.9e-05		0.0342	0.05			0.012
79	0.00315			0.017	0.00062		0.00058	0.00374			0.00742
80	0.0783			0.035	0.00063		0.0007	0.0485			6e-05
81	0.002867			0.00059	0.00027		0.00064	0.00055			0.00083
82	.			0.00046	0.00044		4.8e-05	0.003			0.0051
83				0.0027	0.0027		9e-05	0.0084			0.0038
84				0.0059	0.00273		0.00761	6e-05			0.0005
85				0.0037	0.026		0.00083	0.0704			0.00085
86				0.0001	0.0003		0.00056	0.007			0.00062
87				0.00049	0.0004		0.00093	0.042			0.00587
88				0.0069	0.00028		0.00057	0.0006			0.00092
89				0.0026	0.016		0.000694	0.0639
90				0.0038	0.000469		5e-05	0.0086
91				0.0004	0.00027		0.00063	0.0953
92				0.00058	0.00052		0.0057	0.00856
93				0.0018	0.046		0.0006
94				0.0039	0.0005		0.000465
95				6e-05	0.0026		0.00285
96				0.00059	0.000486		0.0359
97				0.0019	0.00279		0.0047
98				0.00355	0.024		0.0005
99				0.0028	0.0005		0.0073
100				0.0004	0.00063		0.0005
101				0.00049	0.0058		0.00063
102				0.0027	5.7e-05		0.01581
103				0.0009	0.00036		3e-05
104				0.0038	0.002		6e-05
105				0.0048	0.0054		0.00074
106				0.017	0.02		0.0004
107				0.00497	0.0047		0.00073
108				0.004621	0.0036		0.0005
109				0.0027	5.4e-05		0.026
110				0.024	0.0026		0.00051
111				0.00059	0.046		0.00094
112				0.0058	0.0056		0.00586
113				0.0003	0.0005		0.00096
114				0.00047	0.0024		0.00057
115				0.000146	0.0158		0.024
116				0.034	0.0006		5e-05
117					4e-05		7.2e-05
118					0.0136		0.0047
119					0.00047		4e-05
120					3.7e-05		0.0045
121					5e-06		0.0136
122					4e-05		4e-05
123					0.0004		5e-05
124					0.00026		0.0573
125					0.0009		0.0006
126					0.00154		0.0058
127					0.0047		0.0003
128					0.00022		0.0004
129					0.0264		0.0047
130					5e-05		0.0005
131					5.8e-05		0.0031
132					0.00072		0.0004
133					0.047		0.027
134					4.7e-05		0.0004
135					2.4e-05
136					0.00793
137					0.0038
138					0.00263

## Sheet: Sheet2
	Jinghongba				Ganlanba
Number	average width(m)				average width(m)
1	1993	2003	2009	2016	1993	2003	2009	2016
2	247.1	258.3	284.6	293.2	194.7	216.7	284.4	306.6
3	243.1	254.7	284.7	293.7	194.8	216.1	284.3	306.8
4	243.5	255.5	287	293.4	195.6	216.2	285.1	307.1
5	246.2	257.9	286.4	294.1	195.1	216.8	285.8	307.4
6	253.1	264.5	286.9	294.5	195.3	218.1	286.5	307.3
7	254.5	265	287.2	294.3	196.7	218.5	286.5	307.2
8	243	253.6	288.1	294.6	196.4	218.4	286.1	307.9
9	244.5	255.1	288.5	294.2	197.4	219.7	287.4	308.2
10	247.3	258.7	288.7	294.4	197.3	219.6	287.1	308.6
11	247.5	258.3	289.5	295.7	197.9	220.5	287.7	309.4
12	251.3	262.9	287.4	295.1	197.8	220.9	287.3	309.7
13	254.7	265.5	288	295.8	198.3	221.7	288.9	310.9
14	257.4	268.4	289.5	296.4	198.7	221.9	288.3	310.3
15	256.4	267.1	289.2	296.7	198.4	222.5	289.5	310.5
16	256.2	267.4	290.1	297.2	199.6	222.6	289.1	310.2
17	258.9	269.2	289.9	297.6	199.2	224.7	289.4	310.8
18	258.1	269.7	290.3	298.1	199.8	222.8	289.6	211.4
19	258.6	269.6	290.5	298	200.4	222.6	289.3	311.7
20	257.7	268.1	290.4	298.3	200.5	222.5	289.2	312.6
21	261.4	272.4	290.3	298.5	200.9	223	289.3	312.9
22	257.7	268.4	291	298.6	200.7	223.9	290.3	312.6
23	258.3	269.4	290.5	299.6	200.3	223.3	290.7	312.2
24	254.4	266.1	291.5	299.9	201.7	223.7	290	312.8
25	254.8	266.3	291.7	300.1	201.5	223.3	290.5	313.5
26	259.5	270.8	291.4	300.4	202.6	233.4	291.3	313.6
27	261.5	272.7	291.1	300.5	202.9	223.7	291.4	313.7
28	263.5	272.7	290.7	300.7	202.3	223.8	292.7	314.8
29	257.7	268.2	290.4	301.2	202.3	223.7	292.3	314.6
30	259.5	270.5	290.8	301.6	202.5	223.6	292.6	315.7
31	257.4	268.2	291.1	302.7	203.6	223.8	293.1	315.5
32	257	267.7	290.3	302.9	203.8	223.5	293.2	316.7
33	258.3	269.4	289.4	302.1	203.2	223.9	293.9	316.3
34	260.7	271.3	289.8	302.6	203.6	223.4	294.1	316.8
35	259.6	270.7	289.6	302.4	203.1	223.1	294.7	317.8
36	258.4	260.6	290.4	303.6	203.7	223.8	293.5	316.6
37	259.6	269.1	290.7	303.5	203.7	223.7	292.1	315.8
38	263.2	269.6	290.6	302.6	203.2	223.4	292.6	315.7
39	264.7	270	290.1	302.4	203.6	223.8	291.2	315.5
40	265.9	276.7	291	302.8	202.2	222.9	290.2	314.8
41	265.4	273	291.2	302.4	202.7	219.5	289.8	313.1
42	266.2	277.4	291.8	302.1	202.6	219.3	289.5	313.4
43	267.4	277.9	290.3	303.6	202.6	219	289.3	313.7
44	265.3	276.1	289.7	303.5	202.2	219.6	289.5	313.5
45	265.1	276.8	290.4	303.1	202.1	219.8	289.4	313.4
46	268.5	279.6	289.9	302.8
47	267.3	278.4	290.3	302.5
48	264.9	275.7	290.9	302.8
49	263.3	274	289.1	303.6
50	269.1	279.7	289.6	303.4
51	265.1	276.7	289.3	303.6
52	266.2	277.1	290.2	303.9
53	267.4	278.4	290.7	304.6
54	269.8	279.9	290.6	304.1
55	269.1	270.6	290.9	304.2
56	271.6	282.8	291.3	304.1
57	268.3	279.6	291.8	304.7
58	267.4	278.4	292	304.8
59	264.1	275.6	292.7	304.5
60	268.4	279.2	292.3	305.1
61	268.5	279.3	292.2	305.7

## Sheet: Sheet3
	Year	1993	2003	2009	2016
Jinghongba reach	Center line length(km)	6.69	6.7	6.95	7
	Left bank length(km)	11.18	11.28	11.48	11.52
	Right bank length(km)	9.05	9.03	9.45	9.5
	river surface area（km² ）	1.8	1.85	1.93	2.07
	Central bars(km² )	1.31	1.27	1.25	1.21
	Marginal bars(km² )	0.05	0.04	0.03	0.02
	Year	1993	2003	2009	2016
Ganlanba reach	Central line length(km)	6.7	6.82	6.95	7
	Left bank length(km)	8.22	8.27	8.37	8.28
	right bank length（km)	7.87	8.03	8.45	8.5
	river surface area（km² ）	1.31	1.35	1.27	1.37
	Central bars(km² )	1.31	1.27	1.25	1.21
	Marginal bars(km² )	0.05	0.04	0.03	0.02
